# Supplementary material for: Phillygenin Attenuated Colon Inflammation and Improved Intestinal Mucosal Barrier in DSS-induced Colitis Mice via TLR4/Src Mediated MAPK and NF-κB Signaling Pathways
Source: MDPI journal article supplement (doi:10.3390/ijms24032238), 2023-01-23
Supplement: s1 [file s1]

Table S1 KEGG signaling pathways

| KEGG signaling pathway                   | Count (%)   | P-value     | Fold<br>Enrichment | FDR         |
|------------------------------------------|-------------|-------------|--------------------|-------------|
| Ras signaling pathway                    | 16.77852349 | 7.99145E-13 | 6.243842365        | 2.83696E-11 |
| PI3K-Akt signaling pathway               | 19.46308725 | 6.18811E-12 | 4.746731235        | 1.34463E-10 |
| MAPK signaling pathway                   | 16.77852349 | 1.2845E-10  | 4.927113703        | 2.02665E-09 |
| Prolactin signaling pathway              | 8.724832215 | 1.80908E-09 | 10.76081633        | 2.10623E-08 |
| C-type lectin receptor signaling pathway | 10.06711409 | 2.07657E-09 | 8.357142857        | 2.10623E-08 |
| T cell receptor signaling pathway        | 10.06711409 | 2.07657E-09 | 8.357142857        | 2.10623E-08 |
| Relaxin signaling pathway                | 10.73825503 | 4.26989E-09 | 7.186710963        | 3.78953E-08 |
| Estrogen signaling pathway               | 10.73825503 | 1.09082E-08 | 6.718012422        | 8.15247E-08 |
| Rap1 signaling pathway                   | 12.75167785 | 1.54495E-08 | 5.24244898         | 1.04468E-07 |
| VEGF signaling pathway                   | 7.382550336 | 4.84563E-08 | 10.80290557        | 2.77444E-07 |
| Chemokine signaling pathway              | 11.40939597 | 1.53218E-07 | 5.130357143        | 8.05813E-07 |
| FoxO signaling pathway                   | 9.395973154 | 3.22975E-07 | 6.192366412        | 1.47943E-06 |
| IL-17 signaling pathway                  | 8.053691275 | 5.15793E-07 | 7.396960486        | 2.21947E-06 |
| Neurotrophin signaling pathway           | 8.724832215 | 7.88941E-07 | 6.329891957        | 3.11193E-06 |
| ErbB signaling pathway                   | 7.382550336 | 1.65266E-06 | 7.498487395        | 6.17572E-06 |
| Fc epsilon RI signaling pathway          | 6.711409396 | 2.0537E-06  | 8.521008403        | 7.47757E-06 |
| GnRH signaling pathway                   | 7.382550336 | 3.7981E-06  | 6.853456221        | 1.25426E-05 |
| HIF-1 signaling pathway                  | 7.382550336 | 1.58801E-05 | 5.847444299        | 4.50995E-05 |
| TNF signaling pathway                    | 6.711409396 | 0.000121079 | 5.173469388        | 0.000245618 |
| Sphingolipid signaling pathway           | 6.711409396 | 0.000192633 | 4.869147659        | 0.000369647 |
| Phospholipase D signaling pathway        | 7.382550336 | 0.000215225 | 4.306563707        | 0.000407493 |
| Thyroid hormone signaling pathway        | 6.711409396 | 0.000218578 | 4.78866588         | 0.000408396 |
| NOD-like receptor signaling pathway      | 8.053691275 | 0.000304149 | 3.778881988        | 0.000546914 |
| Adipocytokine signaling pathway          | 4.697986577 | 0.001122992 | 5.87826087         | 0.001822751 |
| p53 signaling pathway                    | 4.697986577 | 0.001508082 | 5.556164384        | 0.002379418 |
| JAK-STAT signaling pathway               | 6.711409396 | 0.001809481 | 3.576719577        | 0.002792894 |
| NF-kappa B signaling pathway             | 5.369127517 | 0.00198811  | 4.457142857        | 0.003035608 |
| Insulin signaling pathway                | 6.040268456 | 0.002373841 | 3.806465068        | 0.003511306 |
| mTOR signaling pathway                   | 6.040268456 | 0.005251816 | 3.342857143        | 0.007170748 |
| Toll-like receptor signaling pathway     | 4.697986577 | 0.008738453 | 3.9                | 0.010981065 |
| Oxytocin signaling pathway               | 5.369127517 | 0.016446368 | 3.010018553        | 0.019960549 |
| Apelin signaling pathway                 | 4.697986577 | 0.03195446  | 2.917985612        | 0.036593011 |

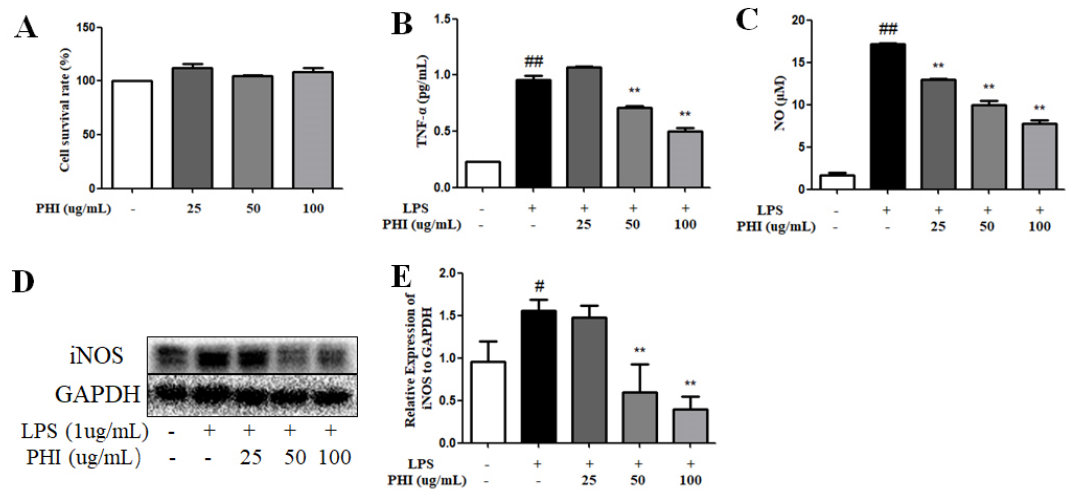

Figure S1. PH1 inhibited the inflammatory response in LPS-Stimulated RAW264.7 Cells. (A) Cell survival rate (%). The content of (B) TNF- $\alpha$  and (C) NO in RAW264.7 cells was detected according to the assay kit methods. (D-E) The expression level of iNOS protein in RAW264.7 cells were detected by western blotting. <sup>#</sup> $P < 0.05$ , <sup>##</sup> $P < 0.01$ , and <sup>###</sup> $P < 0.001$  vs. control group. <sup>\*</sup> $P < 0.05$ , <sup>\*\*</sup> $P < 0.01$ , and <sup>\*\*\*</sup> $P < 0.001$  vs. LPS-stimulated group. ( $n = 3$  per group).
